# Supplementary material for: Modelling oxygen ( 18 O, 17 O, 16 O) and hydrogen ( 2 H, 1 H) water isotopes in the coupled numerical climate model iLOVECLIM (version 1.1.5)
Source: Copernicus journal article supplement (doi:10.5194/gmd-2023-149), 2023-07-17
Supplement: Supplementary file [file gmd-2023-149-AC1-supplement.pdf]

## **Response to Reviewer 1**

We thank Reviewer 1 for the detailed review and suggestions which helped to improve the manuscript. We are providing our answers (in blue) to the comments and will revise the manuscript accordingly.

- **Major comments**

### **1.1 More quantitative and honest assessment about the skills of iLOVECLIM**

First of all, using intermediate complexity models to interpret paleoclimate proxies has advantages relative to using GCMs. I think these advantages could be better emphasized, e.g. in introduction. These advantages come at the expense of a less realistic representation of the climate and isotopic composition. It is expected and there is no shame about it. As a reader, my main motivation for reading this article was to address the following question: For what kind of paleoclimate applications is using iLOVECLIM relevant and safe? For what aspects of isotopic variations is iLOVECLIM realistic enough? I think this article could do a better job at addressing these questions.

Thank you for this comment. We added a new paragraph in the introduction to synthesize previous work on isotope modelling with the climate models and to detail the applications with iLOVECLIM: *“Since the initial works of Joussaume et al. (1984) and Jouzel et al. (1987), much progress has been done in atmospheric general circulation models (AGCMs) (e.g. Hoffmann et al., 1998; Noone and Simmonds, 2002; Mathieu et al., 2002; Risi et al., 2010; Werner et al., 2011) that can simulate accurately the  $\delta^{18}\text{O}$  of precipitation. The subsequent development of water isotopes modules in oceanic general circulation models (OGCMs) (Schmidt, 1998; Delaygue et al., 2000; Xu et al., 2012) opens the possibility for coupled simulations of present and past climates, conserving water isotopes through the hydrosphere (Schmidt et al., 2007; Zhou et al., 2008; Tindall et al., 2009; Werner et al., 2016; Cauquoin et al., 2019). In general, General Circulation Models (GCMs) have been used exclusively to simulate separately water isotopes in the atmospheric and oceanic components. Given the computing resources needed to run coupled climate models, applying intermediate complexity coupled climate models with water isotopes like iLOVECLIM to long-term palaeoclimate perspectives still appears quite suitable (e.g. Caley et al., 2014). It could allow to improve our understanding of the relationship between water isotopologues, second-order parameter (like d-excess) and climate over a broad range of simulated climate changes”.*

In this paper we only investigated the capacity of our model to reproduce the hydrogen isotopic composition, d-excess and  $^{17}\text{O}$ -excess for present day, as it is a development paper. The simulation of the isotopic composition under another past climate period is not within the scope of this paper. But this opens new possibilities to perform long-term transient simulations with a model equipped with the isotopes since iLOVECLIM has the possibility to run simulations over several thousands of years within several weeks/months. For example, paper like Caley et al. (2014) already investigated past changes in the modelled oxygen isotopic composition during a glacial-interglacial cycle. We added a sentence in the manuscript to emphasize this aspect: *“Given the computing resources needed to run coupled climate models, applying intermediate complexity coupled climate models with water isotopes such iLOVECLIM to future long-term palaeoclimate perspectives appear very promising. Paleoclimate simulations during the*

*Holocene, Last Glacial Maximum or transient glacial/interglacial periods are the next logical step to compare model results against past isotopic composition records”.*

Calculate some skill metrics for iLOVECLIM and other GCMs, e.g. model-observation correlations, root-mean-square errors, for  $\delta D$ , d-excess,  $^{17}O$ -excess, possibly in different regions (e.g. entire globe or tropics). The metrics could be summarized in a table or in Taylor plot diagrams for example.

We added in the revised version of the manuscript a Taylor diagram to summarize some metrics (correlation coefficient R, standard deviation SD and root mean square error RMSE) between the models equipped with the isotopic composition and the observations. This new figure compiles the correlation between several water isotopes-enabled models and the GNIP observations for the  $\delta^2H$  (Fig. 1a), d-excess (Fig. 1b),  $^{17}O$ -excess (Fig. 1c) respectively. We do not include the Antarctic values since we cannot properly reproduce the isotopic variations at these latitudes as a consequence of the non-conservative behaviour of the advection scheme at very low moisture content (as already explained). We added the description of these metrics in the different isotopic sections of the revised manuscript relative to the  $\delta^2H$  (Section 3.1.1), d-excess (Section 3.1.2) and  $^{17}O$ -excess (Section 3.1.3).

We observe for the  $\delta^2H_{\text{precipitation}}$  that ECHAM5-wiso is the model that has the best correlation with the observation ( $R=0.64$  vs  $R=0.56$  for iLOVECLIM). The different GCMs have close correlation coefficient (between 0.59 and 0.64), standard deviation (between 40.21 and 46.43) and RMSE (between 34.94 and 39.82). The iLOVECLIM model presents a lower standard deviation ( $SD=29.93$ ) and RMSE than the other models (Fig. 1a). However, considering the close metrics between all models, iLOVECLIM presents the advantage to run faster than other GCMs and is perfectly justified for the use of long-term global climate simulation.

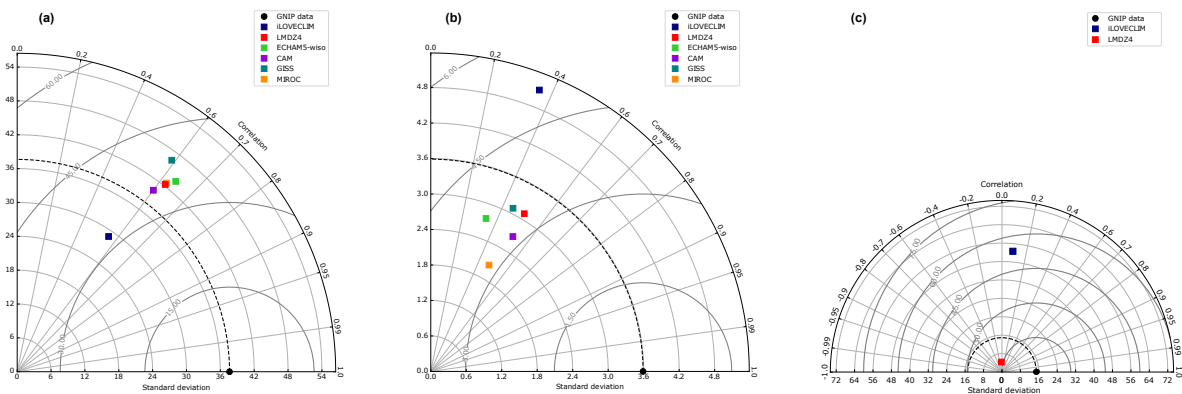

*Figure 1: Taylor diagram representing (a)  $\delta^2H_{\text{precipitation}}$ , (b) d-excess and (c)  $^{17}O$ -excess values for different climate models (iLOVECLIM, LMDZ4, ECHAM5-wiso, CAM, GISS and MIROC) without Antarctic values. The simulated values are plotted against the observations. The dotted curved line indicates the reference line (standard deviation of the observation) and the bold grey contours represent RMSE values.*

For the d-excess and in comparison to the measurements for the atmosphere, iLOVECLIM has a correlation coefficient that is in the range of others models (0.34 to 0.52), but has a higher SD compared to the observations and other GCMs. The CAM model has the best correlation coefficient with the observations whereas LMDZ4 has the closest standard deviation relative to the observations (Fig. 1b). Within all models, MIROC is the one with the

lowest SD and RMSE. However, considering the general low correlation coefficient for all models, they all do not perfectly reproduce the d-excess variations as observed in the data. iLOVECLIM however presents the advantage to run faster than the other GCMs and could be used to investigate past changes in d-excess in global transient simulations.

We observe for the  $^{17}\text{O}$ -excess a low correlation coefficient for iLOVECLIM and a low negative correlation coefficient for LMDZ4 with respect to observations. The standard deviation and root mean square error is better for LMDZ4 than for iLOVECLIM (Fig. 1c), suggesting that our model does not correctly reproduce the  $^{17}\text{O}$ -excess and has a too important dispersion of the values, even if the trend is correct.

In addition to maps, it would be very helpful to assess to what extent iLOVECLIM can simulate the main isotopic effects relative to observations: amount effect (scatter plot of  $\delta\text{D}$  over tropical islands), temperature effect (scatter plot of  $\delta\text{D}$  as a function of temperature), continental effect (e.g. box and whisker plots of  $\delta\text{D}$  within  $20^\circ\text{S}$ - $20^\circ\text{N}$  over land and over ocean). The simulation of these effects could be compared between iLOVECLIM and other GCMs.

I think that evaluating the isotopic effects is essential for a model that is supposed to be used for paleoclimate applications in the future, because isotope effects are an essential ingredient of paleoclimate variations in isotopes.

Thank you for these suggestions. We added several new figures to respectively represent the amount effect, temperature effect and continental effect in the model. We also compared our results against the GNIP data and the LMDZ4 model outputs. The following is presented in the revised manuscript in a new Section 3.2 Evaluation of the main isotopic effects.

### 1. Amount effect

To investigate the amount effect, we first took the monthly outputs of the precipitation and  $\delta^2\text{H}$  of the precipitation from the iLOVECLIM model, from LMDZ4 (Risi et al., 2010) and from the GNIP data (IAEA, 2023). We only extracted values in the models and for the GNIP stations that cover the tropics, from  $0$ - $20^\circ\text{N}$  and from  $0$ - $20^\circ\text{S}$ , to see if a change in precipitation intensity would lead to a change in the hydrogen isotopic composition of the precipitation. For an easier comparison, we normalized the values (we subtracted the annual mean and divided by the standard deviation).

The seasonal cycle in iLOVECLIM is well reproduced and in agreement with the GNIP data (especially for the precipitations between  $0$ - $20^\circ\text{S}$ ). In the north tropics (Fig. 2a), the isotopic composition of the precipitation of iLOVECLIM is more depleted during the wet season (i.e. during the boreal summer). The opposite effect is observed in the south tropics (Fig. 2b), with enriched  $\delta^2\text{H}_{\text{precipitation}}$  during the austral winter, associated with a reduced amount of precipitation. These variations are explained by the fact when the precipitation is subjected to secondary evaporation, heavy isotopes in rainwater will be more enriched. So, the  $\delta^2\text{H}_{\text{precipitation}}$  decreases as precipitation intensity increases. In the model, the minimum depleted  $\delta^2\text{H}_{\text{precipitation}}$  (maximum enriched  $\delta^2\text{H}_{\text{precipitation}}$ ) is also leading the minimum observed for the GNIP stations of one month (maximum observed for the GNIP stations of two months). This delay between the data and the model is also observed for LMDZ4 for the north tropics, with a lag of one month.

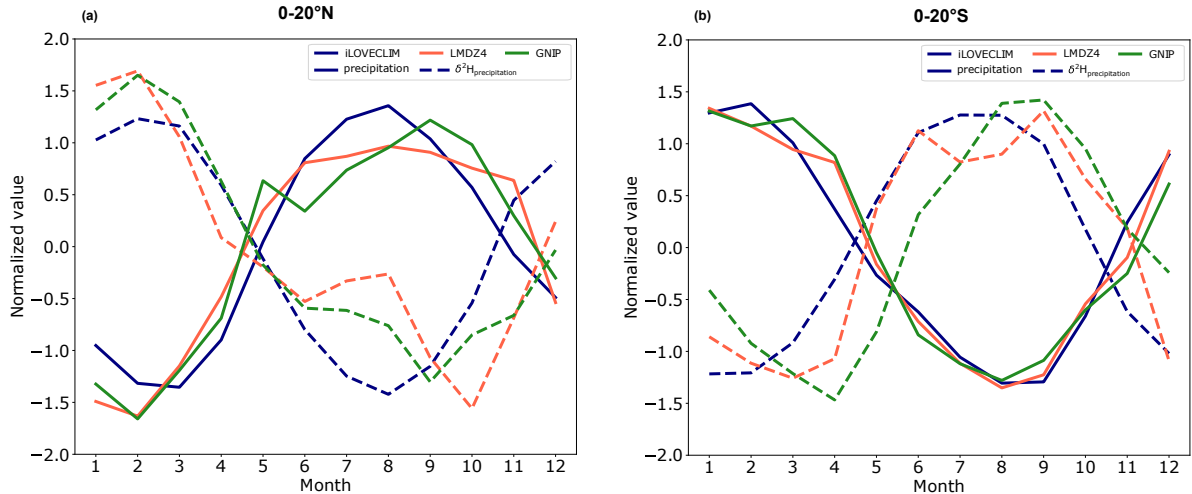

Figure 2: Seasonal variations of the mean precipitation and  $\delta^2H_{\text{precipitation}}$  in the tropics, from 0-20°N for (a) and from 0-20°S for (b). The values have been normalized, the solid lines represent the precipitation and the dashed lines the  $\delta^2H_{\text{precipitation}}$ . The blue curve presents the iLOVECLIM values, the red curve is for LMDZ4 and the green curve corresponds to the GNIP data.

We then further investigate this amount effect by looking at the change in the  $\delta^2H_{\text{precipitation}}$  as a function of the amount of precipitation. Following Risi et al. (2008; 2010), we looked at the seasonal model variations for nine oceanic tropical GNIP stations (Apia, Barbados, Canton Island, Diego Garcia, Madang, Taguac, Truk, Wake Island and Yap). Since the resolution in iLOVECLIM is of 5.6°, the local processes may not be perfectly reproduced and complicate the comparison to local oceanic observation. We then decided to take the best neighbour pixel for each station, by selecting the pixel that was in better agreement with the GNIP data from both precipitation and isotopic composition seasonal cycle. We also decided to not present observational precipitation values above 350  $\text{cm.y}^{-1}$  since in the model precipitations are never higher.

Figure 3 presents the relationship between the  $\delta^2H_{\text{precipitation}}$  and the precipitation for the selected stations in iLOVECLIM and the observation (panel a) and in LMDZ4 (panel b). The isotopic composition of precipitation is enriched for low precipitations and changes toward depleted values as precipitations increase. This amount effect is  $-0.085\text{‰}/\text{cm.y}^{-1}$  for iLOVECLIM, in comparison to  $-0.139\text{‰}/\text{cm.y}^{-1}$  for the GNIP data. The modelled  $\delta^2H_{\text{precipitation}}$  is however higher than the observations for the same precipitation amount (especially at high precipitations). In contrast, the standard version of LMDZ4 has slightly too depleted  $\delta^2H_{\text{precipitation}}$  at low precipitations in comparison to the observations as already observed in Risi et al. (2010).

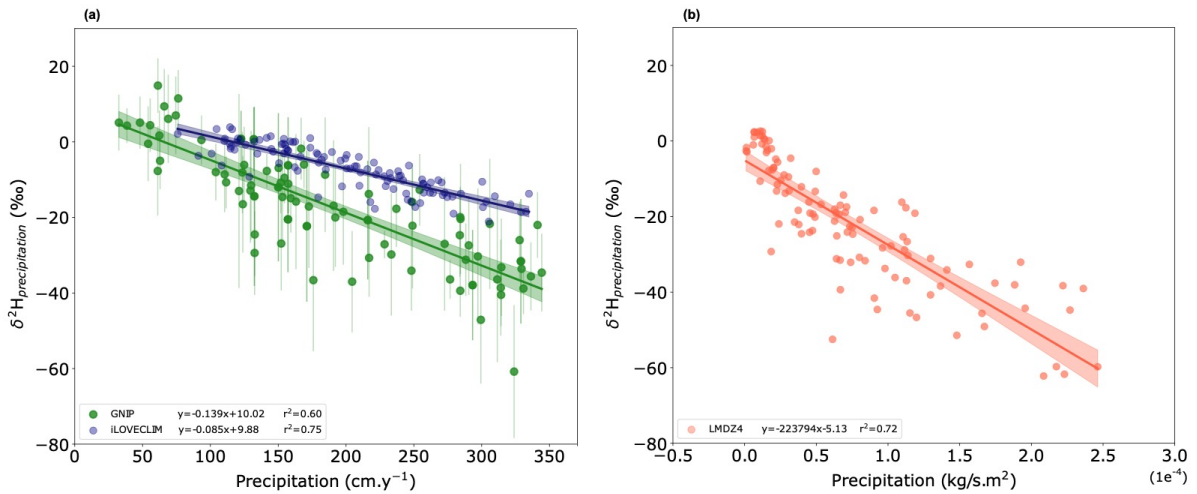

Figure 3: Monthly  $\delta^2H_{precipitation}$  as a function of the precipitation at the location of nine tropical oceanic GNIP stations. (a) iLOVECLIM results in blue compared to GNIP data in green and (b) LMDZ4 results. The error bars for the GNIP data are shown at  $2\sigma$ .

## 2. Temperature effect

We investigate in this part the relationship between the hydrogen isotopic composition of precipitation and the temperature. Since in the model the surface temperature is not a prognostic variable, we used the temperature at 650 hPa and took the equivalent temperature in LMDZ4 model at 662 hPa (both models do not have the same atmospheric vertical distribution). The temperature effect, i.e. enhanced depletion with decreasing temperature, is well observed in both models (Fig. 4a). Differences are however noticed at low temperature (below  $-15^\circ C$ ), mainly corresponding to Antarctic values, with an isotopic composition that is not depleted enough in our model. Antarctic isotopic values are indeed not computed correctly due to issues in the conservation of water in the advection scheme at very low humidity content, as already highlighted in Roche (2013).

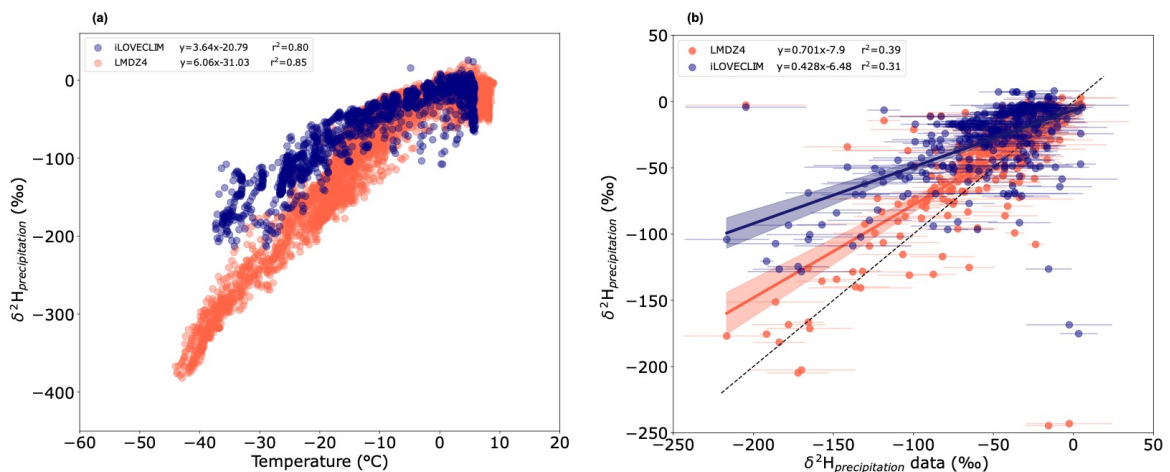

Figure 4: (a) Annual mean modelled  $\delta^2H_{precipitation}$  as a function of the temperature for iLOVECLIM (blue) and LMDZ4 (red). (b) Annual mean modelled  $\delta^2H_{precipitation}$  for iLOVECLIM and LMDZ4 against observations (without Antarctic values). The 1:1 line is shown with the black dashed line. The errors bars associated with the data are shown at  $2\sigma$ . The regression curves between model and data are presented in dark blue for iLOVECLIM and red for LMDZ4 with the confidence bands.



We then investigated the relationship between modelled and measured  $\delta^2\text{H}_{\text{precipitation}}$ , excluding Antarctic values (Fig. 4b). Most of the values are found between 0 and -60‰, with similar distribution in iLOVECLIM and LMDZ4. Depleted values are however more scattered between the two models (and shifted from the 1:1 line) due to the difference in simulating the isotopic composition at low temperature.

### 3. Continental effect

To evaluate the continent effect in the model we extracted the monthly isotopic composition of precipitation over land and ocean separately, and focus on the tropics between 0-20°N and 0-20°S. For the GNIP observations, we only selected stations that have at least 3 measurements for each month. This gives us a total of 22 stations for the northern tropics and of 28 stations for the southern tropics (Table 1). For the different models we used here to compare with iLOVECLIM, the number of points increase with an increase in the model resolution. For example, the iLOVECLIM model with a 5.6° resolution has a total of 268 points (over the continent and ocean) in the northern tropics and of 273 in the southern tropics (Table 1). In comparison, the ECHAM5-wiso model with a 3.75° resolution has a total of 9760 and 7423 points respectively between 0-20°N and 0-20°S. Instead of representing all points, we decided to divide each tropical region into three zones for the continents (America, Africa and Asia/Indonesia/Australia) and three zones for the oceans (Atlantic, Pacific, Indian) and calculated the monthly mean for the different zones. We then obtained three series of monthly values corresponding to the continental zones (and similarly for the oceanic zones) for 0-20°N, and for 0-20°S.

|             | 0-20°N    |       | 0-20°S    |       |
|-------------|-----------|-------|-----------|-------|
|             | Continent | Ocean | Continent | Ocean |
| GNIP        | 13        | 9     | 21        | 7     |
| iLOVECLIM   | 87        | 181   | 83        | 190   |
| LMDZ4       | 248       | 520   | 217       | 550   |
| ECHAM5-wiso | 4306      | 5454  | 1623      | 5800  |

*Table 1: Number of GNIP stations and points in the different models that cover land surfaces and oceans in the tropical bands between 0-20°N and 0-20°S.*

The contrast in isotopic value between land and ocean, with more depleted values over land associated with fractionation during continental recycling, is well observed in the GNIP data for both tropical regions (with a median value of -23 ‰ for the continents and -9.9 ‰ for the oceans in the northern tropics, and -27.9 ‰ vs -6.1 ‰ in the southern tropics, Fig. 5a). Even if most of the climate models do not include this fractionation, they reproduce this shift towards depleted values. This continental effect is observed in iLOVECLIM with a median value of -11.6 ‰ over the continents and of -4.6 ‰ over the oceans for the northern tropics and of -17 and -3.2 ‰ over the continents and oceans respectively in the southern tropics (Fig. 5b). The difference between the land and the ocean is however less pronounced than in the GNIP data with depleted values of 7 ‰ in the model compared to the 13.1 ‰ between 0-20°N for the

observations (13.8 vs 21.8 ‰ between 0-20°S). This smaller depletion in the isotopic composition over land is also observed in the LMDZ4 model. The modelled median values for LMDZ4 are similar to these obtained with iLOVECLIM, despite the difference in complexity and processes represented in the atmosphere. Among all three models, ECHAM5-wiso which least reproduces this continental effect, despite being the more complex in the representation of the physical processes in the atmosphere.

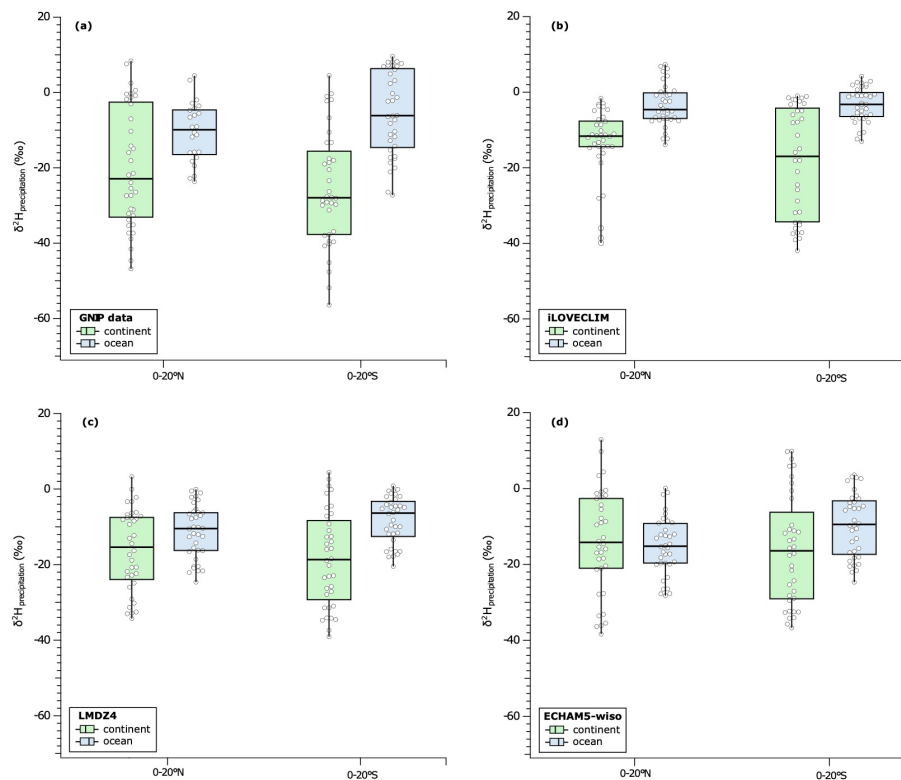

Figure 5: Box plots of the tropical  $\delta^2H_{precipitation}$  over the continents (in green) and oceans (in blue). The panels present values from (a) the GNP data, (b) the iLOVECLIM model, (c) LMDZ4 and (d) ECHAM5-wiso. Values are shown between 0-20°N and between 0-20°S. The horizontal line in the box plots corresponds to the median value.

## 1.2 Suspected problem in the treatment of land evapo-transpiration

I 155-163 needs to be clarified. I 161 writes that “In the same way, evapo-transpiration occurs from the soil bucket water with fractionation”: so what was equation 10 about? Evapo-transpiration represents both evaporation from soils and standing water and transpiration from plants. I cannot think of any water flux between the land and the atmosphere that is not evapo-transpiration.

Why assuming that there is fractionation during evapo-transpiration? Evapo-transpiration is dominated by transpiration (e.g. [Jasechko et al., 2013]) which does not fractionate. Transpiration does not fractionate because no fractionation is associated with root uptake [Washburn and Smith, 1934], the water is transported by the xylem to the leaves without any fractionation, and then the water reservoir in leaves is smaller than the evaporation flux during a day. In all GCMs that are coupled to simple bucket models, evapo-transpiration is assumed not to fractionate (e.g. [Hoffmann et al., 1998, Risi et al., 2010]).

When coupled to more sophisticated land surface models, transpiration is still assumed not to fractionate (e.g. [Haese et al., 2013, Risi et al., 2016]). The bare soil evaporation is assumed to fractionate, but never at equilibrium like equation 10. Rather, the [Craig and Gordon, 1965] equation is assumed, with specific kinetic fractionations for the soil (e.g. [Mathieu and Bariac, 1996, Barnes and Allison, 1988, Haese et al., 2013, Risi et al., 2016]).

The fraction of bare soil evaporation (fractionating) and transpiration (non-fractionating) impacts the isotopic composition of the precipitation over land regions [Haese et al., 2013, Risi et al., 2016]. The non-fractionating transpiration is known to be essential for determining the isotopic gradients over the Amazon, Congo basin and Eastern Africa [Salati et al., 1979, Levin et al., 2009, Worden et al., 2021, Shi et al., 2022] and might also play a role in isotopic changes during past climates [Pierrehumbert, 1999]. I suspect that the big depletion bias simulate over tropical land (Fig 1a) could be partially due to the assumed fractionation during evapo-transpiration. I would recommend to re-run a new simulation without any fractionation during evapo-transpiration. This might help to improve the simulation.

Thanks for the remark and very extended discussion of these processes. The text that is referred to was built from Roche (2013). A careful examination of the model code as used in the simulation presented in this study assumes no fractionation during all land-related evaporation processes, contrary to what was stated in the previous version of the manuscript. We removed Equation 10 and corrected the text accordingly: "*If re-evaporation occurs on land, it is assumed to be at equilibrium (without fractionation)*".

### 1.3 Suspected problem in the simulation of $^{17}\text{O}$ -excess

When looking at Fig 1d or Fig 6b, I'm very worried about the  $^{17}\text{O}$ -excess simulation. Those extreme values from -150 to 150 permeg look very strange. The spatial pattern also looks strange. What would cause such a strange pattern? The LMDZ simulation of  $^{17}\text{O}$ -excess, for example, was much smoother and didn't show this spatial pattern at all. Why is  $^{17}\text{O}$ -excess so noisy in Antarctica and Southern Ocean? Is it a problem with large inter-annual variations and a too short simulation period? Or simply a bug?

You are right, the simulated  $^{17}\text{O}$ -excess in iLOVECLIM is not correctly reproduced and presents a too important dispersion of the values. This is shown when comparing with the measurements (in the Taylor diagram or in the zonal distribution plot). This is not a problem of too short simulation because the model has run 5,000 year and is at equilibrium with the climate. We instead suggest that the  $^{17}\text{O}$ -excess is not properly reproduced mainly because of the complex processes involved in the  $^{17}\text{O}$ -excess isotopic value, and because of difficulties in modelling the isotopic composition for area with very low humidity content (especially for Antarctic values).

In comparison, LMDZ4 shows indeed much smoother variations and less dispersion than iLOVECLIM but presents a general trend that is the opposite to the one observed in the measurements (Figure 6), suggesting that both models do not perfectly reproduce the  $^{17}\text{O}$ -excess, but probably for different reason.

We clearly state in the revised manuscript that iLOVECLIM does not correctly reproduce the  $^{17}\text{O}$ -excess.



The traverse data from [Pang et al., 2015] shows much smoother variations. Given the scarcity of  $^{17}\text{O}$ -excess observations, the data from [Pang et al., 2015] deserves to be used and cited in this paper. The dataset from [Uemura et al., 2010] deserves to be used and cited as well. I understand that it was in the vapor and iLOVECLIM does not allow for a model-data comparison of the vapor. Yet this dataset provides useful information: it shows that over the ocean, the  $^{17}\text{O}$ -excess varies very smoothly and is mainly controlled by the surface relative humidity. This observation makes the simulation by iLOVECLIM all the more suspect.

Thank you for pointing us these datasets. We added the data of Uemura et al. (2010) and Pang et al. (2015) to the  $^{17}\text{O}$ -excess figures in the revised manuscript for a better model-data comparison.

I understand that  $^{17}\text{O}$ -excess is very difficult to simulate in models. I don't think that a proper simulation of  $^{17}\text{O}$ -excess is a necessary condition to publish this paper. However, I do think that honest statements about the failure of iLOVECLIM to simulate  $^{17}\text{O}$ -excess, and speculation on the causes for this failure, would be very valuable. For example, I 320-321: "could get closer": could also get further away... I don't think it is very honest to pretend that the model-data disagreement is due to uncertainties. Given the completely different ranges of  $^{17}\text{O}$ -excess values for observations and iLOVECLIM showed in Fig 6b, and given the smooth variations that have been reported in all  $^{17}\text{O}$ -excess observations so far, I think the authors can state with a high degree of confidence that iLOVECLIM fails to properly simulate  $^{17}\text{O}$ -excess.

Based on the new figures to evaluate the model metrics like model-observation correlation or RMSE, we now properly state in the revised manuscript that the  $^{17}\text{O}$ -excess is not correctly reproduced in iLOVECLIM. This is based on low correlation coefficient between iLOVECLIM and the observations, on the higher dispersion of the data, standard deviation and root mean square errors than LMDZ4.

- **Line by line comments**

I 11: remove "and numerical models": we don't need isotopes to infer hydrological changes in numerical models, these can be directly diagnosed by outputting all necessary variables.

You are correct. We removed it from the text.

I 24: compare -> compared

Done.

I 24: And? The reader here expects a sentence assessing the skill of iLOVECLIM for  $^{17}\text{O}$ -excess. This is a key aspect of the paper and it needs to be in the abstract.

We added the following sentence in the abstract to highlight the capacity of iLOVECLIM to model the  $^{17}\text{O}$ -excess: "*The modelled  $^{17}\text{O}$ -excess presents a too important dispersion of the values in comparison to the observations and is not correctly reproduced in the model mainly because of the complex processes involved in the  $^{17}\text{O}$ -excess isotopic value.*".

I 53: "new method ... 2006... 2008." I don't think methods published more than 15 years ago can still be called "new".

We replaced “new method” by “another method”.

I 90: “500 and 200hPa ... dry layers correspond to the stratosphere”: Does it make any sense that the stratosphere is so low in altitude? Don't these levels simply represent the free troposphere?

This was indeed incorrectly formulated. The text has been modified and now reads: “*It is subdivided in three vertical layers at 800, 500 and 200 hPa with the humidity contained only in the first layer and representative of the total humidity content of the atmosphere*”.

I 110-115: Equation 4 is simply the [Craig and Gordon, 1965] equation. This is the equation used in all isotope-enabled model, including all GCMs. I don't know why the authors introduce it in such a complicated way, and why Cappa et al 2003 and Roche 2013 need to be cited for this. Rather, [Craig and Gordon, 1965] should be cited. “The evaporation term...”: Really? If you write the bulk evaporation equation for humidity, and the same for isotopes, you take the ratio, and you find the [Craig and Gordon, 1965]. So I don't understand the problem.

In Roche (2013) the derivation of the equation for the isotopic evaporation was based on the Cappa et al. (2003) model which is fully-derived within the text of the reference (see their Equation A9). We acknowledge that the approach of Cappa et al. (2003) is very similar to the Craig and Gordon (1965) approach and thus leads to very similar formula. The Craig and Gordon (1965) approach in itself is a family of models; we have thus modified the text accordingly which now reads: “*The solution adopted by Roche (2013) is to compute the water isotopic ratio in the evaporation using a Craig and Gordon (1965) type-model in the formulation adapted by Cappa et al. (2003)*”. However, as highlighted in Roche (2013), the ECBilt model does not prognostically simulate the variables we need to be consistent with the Cappa et al. (2003) formulation, hence the use of the apparent humidity  $h_a^*$  (see next question).

Ra, ha: what do they represent? Does it represent the isotopic composition of the 800hPa layer? Physically, does it represent the “free atmosphere”, or the boundary layer? If this really represents the “free atmosphere”, does this lead to a systematic bias, with too depleted Ra? Is there a correction to account for this? “free atmosphere”: should rather be “free troposphere”?

As described in Section 2.1, the model is T21L3 with humidity only in the first layer. Therefore, any variable relating to humidity in the atmosphere (such as relative humidity, water content, isotopic composition of the vapor) represents the content of the first layer that is the whole atmospheric content (see Figure 1 of Roche, 2013).

I 128: “tropopause, mid-troposphere”: what do these levels correspond to? Do these correspond to 200hPa and 500hPa respectively? It would be clearer to refer to the levels in hPa rather.

As mentioned before, ECBilt is a T21L3 model with layers at 800, 500 and 200 hPa. There is indeed no assumption of the location of the tropopause. This was ill-formulated in the previous version of the manuscript which now reads: “*The precipitations (convective and large scale) and snow are in equilibrium with isotopic values at 650, 800 hPa and 650 hPa respectively*”.

I 150: is there any representation of evaporation of rain as it falls? Rain evaporation is known to be essential for simulating the amount effect, e.g. [Field et al., 2010, Risi et al., 2021]. If there is no rain evaporation, does it mean that the iLOVECLIM cannot represent the amount

effect? Does it mean that any use of iLOVECLIM to interpret paleoclimate proxies in tropical regions is problematic? It would be very helpful to show to what extent iLOVECLIM is able to simulate the amount effect, see major comment 1. From Fig 1 it looks like it is not, but it's hard to see on a map.

ECBilt has no representation of re-evaporation of rain as it falls (Opsteegh et al., 1998): this is now explicitly mentioned in Section 2.1: "*Water fluxes crossing the limit between the humid and dry layers are rained out instantly as convective rain*". Regarding the amount effect, see the answer above in major comment 1.1.

I 174: what is the time step of the model?

The atmospheric module has a timestep of 6 hours and the oceanic module has a daily timestep. We added these timesteps in the respective Sections 2.1 and 2.2 for the atmosphere and the ocean.

I 205: "Risi et al 2012" can be used as a reference for SWING2, but for LMDZ4, replace by [Risi et al., 2010].

Done.

I 205: are all these simulations part of the SWING2 database? If so, write it.

We added a paragraph in the Section 2.4 Observational data and water isotopes-enabled GCMs, to list the model results used in the paper to compare with. We specify that most of them comes from the SWING2 database. The manuscript now reads: "*To evaluate our model results against water isotopes-enabled GCMs, we used several model outputs: ECHAM5-wiso (Steiger et al., 2018), GISS (Schmidt et al., 2007), LMDZ4 (Risi et al., 2010, Risi et al., 2013), MIROC (Kurita et al., 2011), CAM (Lee et al., 2007) and MPI-ESM-wiso (Cauquoin et al., 2020). The GISS, LMDZ4, MIROC and CAM data are from the Stable Water Isotope Intercomparison Group, Phase 2 (SWING2) (Risi et al., 2012).  $\delta^2H_{seawater}$  in MPI-ESM-wiso has been calculated from  $\delta^{18}O_{seawater}$  and d-excess outputs*".

I 210: "better reproduce isotopic change above 80°N than in the other models": I cannot see this in Fig 2. There isn't any observation above 80°N in this Fig.

Following a minor comment below on the Figure 2 to make to model results co-locate with the observations, we now present in the revised manuscript a new figure for the zonal distribution. We adapted the text accordingly.

Fig 1: I don't think the map for  $\delta^{17}O$  is useful, since it shows exactly the same as for  $\delta^2H$ . The added value of  $\delta^{17}O$  relative to other isotopes is already well summarized by  $^{17}O$ -excess in Fig 1d. In contrast, I think that it would be worth to show the model-observation comparison for temperature and precipitation, because these variables can help interpret some of the model biases for isotopes.

We agree and removed the  $\delta^{17}O$  results (spatial distribution and model-data comparison) from the main text. Instead, we added an Appendix A for the  $\delta^{17}O$  to show in a first figure the spatial

distribution of the isotopic composition in the atmosphere and ocean and the model results against the observations in a second figure.

Fig 2: were the model outputs co-located with the measurements? For a more rigorous comparison, it might be useful to do so.

In the first version of the manuscript, Fig. 2 were presenting the zonal distribution of the mean latitudinal isotopic composition. In the revised manuscript we present a zonal multi-model comparison of the  $\delta^2\text{H}_{\text{precipitation}}$  and d-excess by taking the model outputs that co-locate with the measurements as suggested. However, to get a clear representation, we do not show each datapoint for the set of models but present the polynomial regression curve instead. Note that for the d-excess and  $^{17}\text{O}$ -excess, we removed the outlier values located in coastal regions of Antarctica (as highlighted in the manuscript) from the figure to get a better zonal multi-model comparison of the isotopic composition. We also decided to not show the zonal  $^{17}\text{O}$ -excess distribution in the main manuscript because only two models are currently available and because the Taylor diagram and the  $^{17}\text{O}$ -excess model-data comparison give sufficient statistical information to discuss on the capacity of the models to reproduce the  $^{17}\text{O}$ -excess. The zonal  $^{17}\text{O}$ -excess distribution is however presented in this document (Figure 6).

We developed the text in the Section 3.1.1 about  $\delta^2\text{H}_{\text{precipitation}}$  and 3.2.2 about d-excess in the revised manuscript to refer to this new figure.

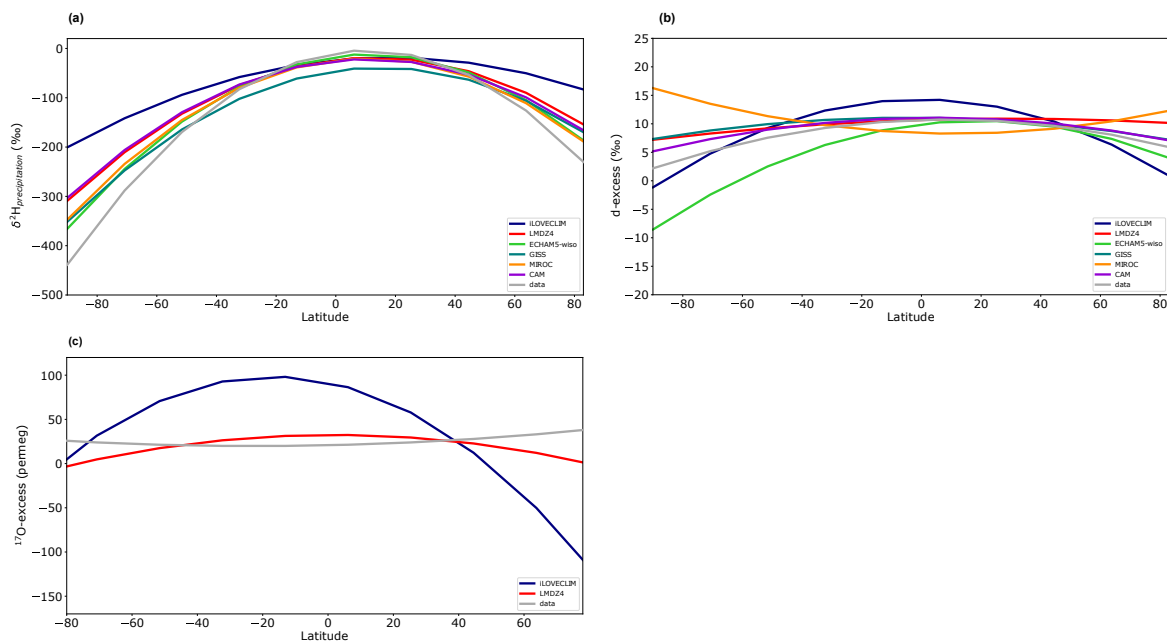

Figure 6: Multi-model zonal (a)  $\delta^2\text{H}_{\text{precipitation}}$ , (b) d-excess and (c)  $^{17}\text{O}$ -excess comparison. The model results (in color) are compared to observations (in grey). The different lines are polynomial regression curves for the model results that co-locate with the observations.

Fig 2: it would be useful to have the same for d-excess and  $^{17}\text{O}$ -excess. More generally, it looks like there is a new figure style for each isotopic variable. It would help the reader to have more coherent figures between the different variables. e.g. zonal mean for  $\delta^2\text{H}$ , d-excess and  $^{17}\text{O}$ -excess, same style of model-obs scatter plot for  $\delta^2\text{H}$ , d-excess and  $^{17}\text{O}$ -excess, etc...

See response on the comment above.

If there are too many figures, I think Fig 3 is not so useful. The MWL is not a stringent test on the simulations.

Following your comment and the one of the reviewer 2, we removed the Figure 3 from the manuscript.

I 285-290, 301-310: maybe these paragraphs could be summarized by just noticing that the spatial pattern of  $\delta^{17}\text{O}$  looks almost exactly the same as  $\delta^{18}\text{O}$ ? The  $^{17}\text{O}$ -excess parameter is what bears the added value.

Following your comment and the one of the reviewer 2 to remove the figures for  $\delta^{17}\text{O}$ , we simplified the section 3.1.3 to focus on the  $^{17}\text{O}$ -excess results only. We moved the  $\delta^{17}\text{O}$  results to the Appendix A " $\delta^{17}\text{O}$  isotopic composition".

I 311: "proxy" -> "variable". For present day,  $\delta^{17}\text{O}$  is directly measured.

We changed the word proxy to variable.

Fig 9: same for d-excess?

We added this new figure in the manuscript in addition to the already existing  $\delta^2\text{H}_{\text{precipitation}}$  zonal figure. Similarly to the response above, we selected the model outputs that co-locate with the measurements.

I 424: "relatively similar close to zero values" -> values close to 0h. Same problem I200

We made the change in the text.

I 443: remove "a better agreement... at least", because only the second part of the sentence is correct.

Done.

Fig A1: I think this figure should replace Fig 4 in the text, and the appendix text can be merged in the main text. Everything that could be seen in Fig 4 can be seen in A1.

We replaced the Figure 4 by the Figure A1 and merged the text in the Appendix with the main text.

Please check the reference list. Some articles cited in the text are missing, e.g. Werner et al 2011.

The reference of Werner et al. 2011 was already in the reference list but we double-checked to make sure that every cited article was listed.

## References

- Caley, T., Roche, D. M., and Renssen, H.: Orbital Asian Summer Monsoon Dynamics Revealed Using an Isotope-Enabled Global Climate Model, *Nat. Commun.*, 5, 5374, <https://doi.org/10.1038/ncomms6371>, 2014.
- Cappa, C. D., Hendricks, M. B., DePaolo, D. J., and Cohen, R. C.: Isotopic fractionation of water during evaporation, *J. Geophys. Res.*, 108, 4525, doi:10.1029/2003JD003597, 2003.
- Cauquoin, A., Werner, M., and Lohmann, G.: Water isotopes – climate relationships for the mid-Holocene and preindustrial period simulated with an isotope-enabled version of MPI-ESM, *Clim. Past*, 15, 1913–1937, <https://doi.org/10.5194/cp-15-1913-2019>, 2019.
- Cauquoin, A., Werner, M., Lohmann, G.: MPI-ESM-wiso simulations data for preindustrial and mid-Holocene conditions, PANGAEA, <https://doi.org/10.1594/PANGAEA.912258>, 2020.
- Craig, H. and Gordon, L.: Deuterium and oxygen 18 variations in the ocean and the marine atmosphere, Consiglio Nazionale delle Ricerche, Laboratorio di Geologia Nucleare, Pisa, 9–130, 1965.
- Delaygue, G., Jouzel, J., and Dutay, J. C.: Oxygen 18-salinity relationship simulated by an oceanic general circulation model, *Earth Planet. Sc. Lett.*, 178, 113–123, doi:10.1016/S0012-821X(00)00073-X, 2000.
- Hoffmann, G., Werner, M., and Heimann, M.: Water isotope module of the ECHAM atmospheric general circulation model: a study on timescales from days to several years, *J. Geophys. Res.-Atmos.*, 103, 16871–16896, <https://doi.org/10.1029/98JD00423>, 1998.
- IAEA: Global Network of Isotopes in Precipitation. The GNIP Database. Accessible at: <https://nucleus.iaea.org/wiser> (last access: 4 May 2023), 2023.
- Joussaume, S., Jouzel, J., and Sadourny, R.: A general circulation model of water isotope cycles in the atmosphere, *Nature*, 311, 24–29, <https://doi.org/10.1038/311024a0>, 1984.
- Jouzel, J., Russel, G. L., Suozzo, R. J., Koster, R. D., White, J. W., and Broecker, W. S.: Simulations of the HDO and H<sub>2</sub><sup>18</sup>O atmospheric cycles using the NASA/GISS general circulation model: the seasonal cycle for present-day conditions, *J. Geophys. Res.*, 92, 14739–14760, doi:10.1029/JD092iD12p14739, 1987.
- Kurita, N., Noone, D., Risi, C., Schmidt, G. A., Yamada, H., and Yoneyama, K.: Intraseasonal isotopic variation associated with the Madden–Julian Oscillation, *J. Geophys. Res.-Atmos.*, 116, D24101, doi:10.1029/2010JD015209, 2011.
- Lee, J.-E., Fung, I., DePaolo, D. J., and Henning, C. C.: Analysis of the global distribution of water isotopes using the NCAR atmospheric general circulation model, *J. Geophys. Res.*, 112, D16306, doi:10.1029/2006JD007657, 2007.
- Mathieu, R., Pollard, D., Cole, J. E., White, J. W. C., Webb, R. S., and Thompson, S. L.: Simulation of stable water isotope variations by the GENESIS GCM for modern conditions, *J. Geophys. Res. (Atmospheres)*, 107(D4), 4037, doi:10.1029/2001JD900255, 2002.
- Noone, D. and Simonds, I.: Association between <sup>18</sup>O of water and climate parameters in a simulation of atmospheric circulation for 1979–95, *J. Climate*, 15, 3150–3169, [https://doi.org/10.1175/1520-0442\(2002\)015%3C3150:ABOOWA%3E2.0.CO;2](https://doi.org/10.1175/1520-0442(2002)015%3C3150:ABOOWA%3E2.0.CO;2), 2002.



- Opsteegh, J. D., Haarsma, R. J., Selten, F. M., and Kattenberg, A.: ECBILT: a dynamic alternative to mixed boundary conditions in ocean models, *Tellus A*, 50, 348–367, <https://doi.org/10.1034/j.1600-0870.1998.t01-1-00007.x>, 1998.
- Pang, H., Hou, S., Landais, A., Masson-Delmotte, V., Prie, F., Steen-Larsen, H. C., Risi, C., Li, Y., Jouzel, J., Wang, Y., He, J., Minster, B., and Falourd, S.: Spatial distribution of  $^{17}\text{O}$ -excess in surface snow along a traverse from Zhongshan station to Dome A, East Antarctica, *Earth Planet. Sc. Lett.*, 414, 126–133, <https://doi.org/10.1016/j.epsl.2015.01.014>, 2015.
- Risi, C., Bony, S., Vimeux, F., Descroix, L., Ibrahim, B., Lebreton, E., Mamadou, I., and Sultan, B.: What controls the isotopic composition of the African monsoon precipitation? Insights from event-based precipitation collected during the 2006 AMMA campaign, *Geophys. Res. Lett.*, 35, doi:10.1029/2008GL035920, 2008.
- Risi, C., Landais, A., Bony, S., Jouzel, J., Masson-Delmotte, V., and Vimeux, F.: Understanding the  $^{17}\text{O}$  excess glacial-interglacial variations in Vostok precipitation, *J. Geophys. Res.-Atmos.*, 115, doi:10.1029/2008jd011535, 2010.
- Risi, C., Noone, D., Worden, J., Frankenberg, C., Stiller, G., Kiefer, M., Funke, B., Walker, K., Bernath, P., Schneider, M., Wunch, D., Sherlock, V., Deutscher, N., Griffith, D., Wennberg, P.O., Strong, K., Smale, D., Mahieu, E., Barthlott, S., Hase, F., García, O., Notholt, J., Wameke, T., Toon, G., Sayres, D., Bony, S., Lee, J., Brown, D., Uemura, R., and Sturm, C.: Process-evaluation of tropospheric humidity simulated by general circulation models using water vapor isotopologues: 1. Comparison between models and observations, *J. Geophys. Res.*, 117, D05303, doi:10.1029/2011JD016621, 2012.
- Risi, C., Landais, A., Winkler, R., and Vimeux, F.: Can we determine what controls the spatio-temporal distribution of d- excess and  $^{17}\text{O}$ -excess in precipitation using the LMDZ general circulation model?, *Clim. Past*, 9, 2173–2193, doi:10.5194/cp-9-2173-2013, 2013.
- Roche, D. M. and Caley, T.:  $\delta^{18}\text{O}$  water isotope in the iLOVECLIM model (version 1.0) – Part 2: Evaluation of model results against observed  $\delta^{18}\text{O}$  in water samples, *Geosci. Model Dev.*, 6, 1493–1504, <https://doi.org/10.5194/gmd-6-1493-2013>, 2013.
- Schmidt, G. A.: Oxygen-18 variations in a global ocean model, *Geophys. Res. Lett.*, 25, 1201–1204, doi:10.1029/98GL50866, 1998.
- Schmidt, G. A., LeGrande, A. N., and Hoffmann, G.: Water isotope expressions of intrinsic and forced variability in a coupled ocean-atmosphere model, *J. Geophys. Res.*, 112, D10103, doi:10.1029/2006JD007781, 2007.
- Steiger, N.: Historical climate model output of ECHAM5-wiso from 1871-2011 at T106 resolution [data set], <https://doi.org/10.5281/zenodo.1249604>, 2018.
- Tindall, J. C., Valdes, P. J., and Sime, L. C.: Stable water isotopes in HadCM3: Isotopic signature of El Niño Southern Oscillation and the tropical amount effect, *J. Geophys. Res.*, 114, D04111, doi:10.1029/2008jd010825, 2009.
- Uemura, R., Barkan, E., Abe, O., and Luz, B.: Triple isotope composition of oxygen in atmospheric water vapor, *Geophys. Res. Lett.*, 37, L04402, doi:10.1029/2009gl041960, 2010.

- Werner, M., Haese, B., Xu, X., Zhang, X., Butzin, M., and Lohmann, G.: Glacial–interglacial changes in  $\text{H}_2^{18}\text{O}$ , HDO and deuterium excess – results from the fully coupled ECHAM5/MPI-OM Earth system model, *Geosci. Model Dev.*, 9, 647–670, <https://doi.org/10.5194/gmd-9-647-2016>, 2016.
- Xu, X., Werner, M., Butzin, M., and Lohmann, G.: Water isotope variations in the global ocean model MPI-OM, *Geosci. Model Dev.*, 5, 809–818, doi:10.5194/gmd-5-809-2012, 2012.
- Zhou, J., Poulsen, C. J., Pollard, D., and White, T. S.: Simulation of modern and middle Cretaceous marine  $\delta^{18}\text{O}$  with an ocean–atmosphere general circulation model, *Paleoceanography*, 23, PA3223, doi:10.1029/2008PA001596, 2008.
